# Supplementary material
Source: MDPI journal article supplement (https://www.mdpi.com/2571-6980/3/3/6)
Supplement: s1 [file s1]

| Aloin |           | Ginkgolide A |           |
|-------|-----------|--------------|-----------|
| A-1   | 10 µg/ml  | G-1          | 0.5 µg/ml |
| A-2   | 50 µg/ml  | G-2          | 1 µg/ml   |
| A-3   | 100 µg/ml | G-3          | 2.5 µg/ml |
| A-4   | 250 µg/ml | G-4          | 5 µg/ml   |
| A-5   | 500 µg/ml | G-5          | 10 µg/ml  |

**Figure S1.** Naming procedure used for aloin and ginkgolide A studies.
